# Supplementary material for: Effect of crosslinking and long-term storage on the shape-memory behavior of (meth)acrylate-based shape-memory polymers
Source: Royal Society of Chemistry journal article supplement (doi:10.1039/c2sm25298h), 2012-01-01
Supplement: c2sm25298h.pdf [file c2sm25298h.pdf]

## Electronic supplementary information (ESI)

**Table S1** Shape-memory material compositions used in this study in Wt% and Mole% crosslinking agent (CA).

| Wt% CA | Mole% CA |
|--------|----------|
| 0      | 0        |
| 2      | 0.6      |
| 10     | 3.2      |
| 40     | 16.6     |

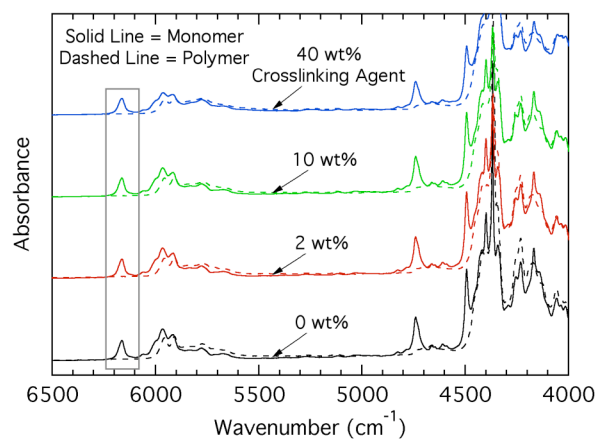

**Figure S1** Representative scans from NIR analysis of the four polymer compositions tailored for this study. Double-bond conversion was determined by the disappearance of the peak at approximately  $6165 \text{ cm}^{-1}$ .

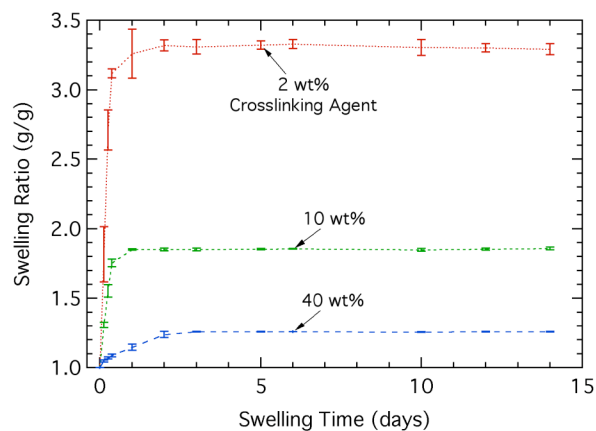

**Figure S2** Swelling ratios, in 2-Propanol, as a function of swelling time (time in solvent) for the three crosslinked shape-memory materials used in this study.

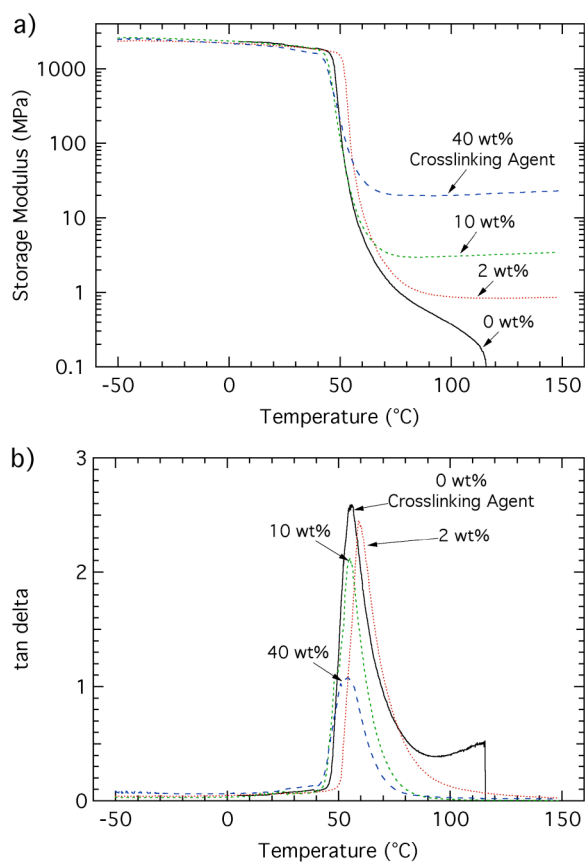

**Figure S3** Representative a) storage modulus and b) tan delta curves as a function of temperature for the four shape-memory materials used in this study.

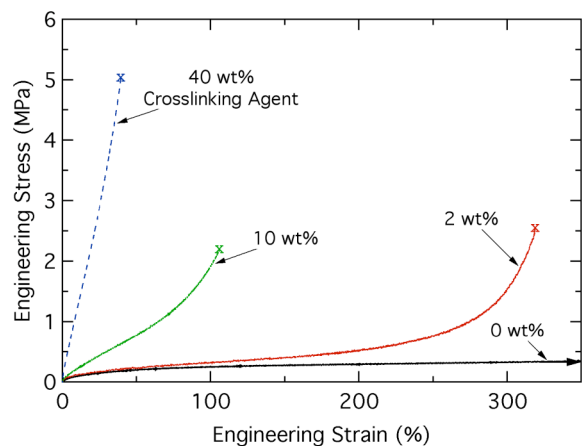

**Figure S4** Representative tensile stress-strain curves where the “x” indicates sample failure (fracture).

**Table S2** Stored recovery ratios ( $RR_s$ ) for the four materials used in this study after storage (for varying storage times up to ~1 year) and recovery. CA = Crosslinking Agent

| Mean Storage<br>Time (Days) | Stored Recovery Ratios ( $RR_s$ ) |          |           |           |
|-----------------------------|-----------------------------------|----------|-----------|-----------|
|                             | 0 wt% CA                          | 2 wt% CA | 10 wt% CA | 40 wt% CA |
| 1 ± 0                       | 99 ± 2                            | 99 ± 3   | 103 ± 1   | 107 ± 0   |
| (n = 8)                     | (n = 2)                           | (n = 2)  | (n = 2)   | (n = 2)   |
| 2 ± 0                       | 99 ± 1                            | 98 ± 0   | 108 ± 2   | 112 ± 0   |
| (n = 8)                     | (n = 2)                           | (n = 2)  | (n = 2)   | (n = 2)   |
| 7 ± 0                       | 99 ± 0                            | 101 ± 1  | 107 ± 4   | 99 ± 8    |
| (n = 14)                    | (n = 3)                           | (n = 4)  | (n = 3)   | (n = 4)   |
| 14 ± 0                      | 98 ± 1                            | 98 ± 1   | 103 ± 2   | 104 ± 1   |
| (n = 8)                     | (n = 2)                           | (n = 2)  | (n = 2)   | (n = 2)   |
| 27 ± 0                      | 97 ± 1                            | 101 ± 0  | 100 ± 1   | 101 ± 3   |
| (n = 8)                     | (n = 2)                           | (n = 2)  | (n = 2)   | (n = 2)   |
| 60 ± 0                      | 97 ± 1                            | 99 ± 2   | 101 ± 2   | 93 ± 6    |
| (n = 8)                     | (n = 2)                           | (n = 2)  | (n = 2)   | (n = 2)   |
| 90 ± 1                      | 98 ± 1                            | 98 ± 0   | 104 ± 2   | 95 ± 1    |
| (n = 7)                     | (n = 2)                           | (n = 1)  | (n = 2)   | (n = 2)   |
| 183 ± 1                     | 98 ± 1                            | 99 ± 2   | 102 ± 4   | 98 ± 2    |
| (n = 8)                     | (n = 2)                           | (n = 2)  | (n = 2)   | (n = 2)   |
| 386 ± 3                     | 96 ± 0                            | 97 ± 0   | 104 ± 1   | 95 ± 3    |
| (n = 8)                     | (n = 2)                           | (n = 2)  | (n = 2)   | (n = 2)   |
